# Supplementary material for: Secreted Adipocytokines in Harvested Visceral Fat Differ over Age and Diet in Control and High-Fat Diet Fed Female C3H/Hej Mice
Source: Preprints.org preprint supplement (doi:10.20944/preprints202403.1040.v1), 2024-03-18
Supplement: Supplementary file 1 [file supplementary]

**Appendix A**

**Supplementary Table A1**. Total dietary components and formulations.

|  | D20013102 | D20013106 |
| --- | --- | --- |
| Product # | 11 kcal% Fat  *Control Diet* | 46 kcal% Fat  *High-Fat Diet* |
| Ingredient (g) |  |  |
| Casein | 200 | 200 |
| L-Cystine | 3 | 3 |
| Corn Starch | 452.2 | 72.8 |
| Maltodextrin 10 | 75 | 100 |
| Sucrose | 175.21 | 175.21 |
| Cellulose | 50 | 50 |
| Soybean Oil | 25 | 25 |
| Lard | 0 | 0 |
| Beef Fat, Bunge | 20 | 177.5 |
| Mineral Mix S10026 (No Ca, P, K) | 0 | 0 |
| Mineral Mix S10026A (No Ca, P, K, Na, Cl) | 5 | 5 |
| Dicalcium Phosphate | 13 | 13 |
| Calcium Carbonate | 5.5 | 5.5 |
| Potassium Citrate, 1 H2O | 16.5 | 16.5 |
| Sodium Chloride | 2.546 | 2.546 |
| Vitamin Mix V10001 | 10 | 10 |
| Choline Bitartrate | 2 | 2 |
| Cholesterol | 0.6 | 0.49 |
| Yellow Dye #5, FD&C | 0 | 0 |
| Red Dye #40, FD&C | 0.05 | 0 |
| Blue Dye #1, FD&C | 0 | 0.05 |
| Total | 1055.606 | 845.798 |
|  |  |  |
| gm |  |  |
| Protein | 179.0 | 179.0 |
| Carbohydrate | 712.4 | 358.0 |
| Fat | 47.4 | 204.9 |
| Fiber | 50.0 | 50.0 |
| Cholesterol | 0.66 | 0.66 |
|  |  |  |
| gm% |  |  |
| Protein | 17.0 | 20.8 |
| Carbohydrate | 67.5 | 41.7 |
| Fat | 4.5 | 23.9 |
| Fiber | 4.7 | 5.8 |
| Cholesterol | 0.062 | 0.08 |
|  |  |  |
| kcals |  |  |
| Protein | 716.0 | 716.0 |
| Carbohydrate | 2849.6 | 1432.0 |
| Fat | 426.6 | 1844.1 |
| Total | 3992.2 | 3992.1 |
|  |  |  |
| kcal% |  |  |
| Protein | 18 | 18 |
| Carbohydrate | 71 | 36 |
| Fat | 11 | 46 |
| Total | 100 | 100 |
|  |  |  |
| kcal/gm | 3.8 | 4.6 |
|  |  |  |
| Linoleic Acid, gm/kg Diet (NRC Requirement is 6.8) | 12.9 | 21.9 |
| Arginine, gm/kg Diet (NRC Requirement is 3.0) | 5.6 | 6.9 |
| Histidine, gm/kg Diet (NRC Requirement is 2.0) | 4.3 | 5.2 |
| Isoleucine, gm/kg Diet (NRC Requirement is 4.0) | 7.1 | 8.7 |
| Leucine, gm/kg Diet (NRC Requirement is 7.0) | 14.9 | 18.3 |
| Valine, gm/kg Diet (NRC Requirement is 5.0) | 8.7 | 10.7 |
| Threonine, gm/kg Diet (NRC Requirement is 4.0) | 6.7 | 8.3 |
| Lysine, gm/kg Diet (NRC Requirement is 4.0) | 12.3 | 15.1 |
| Methionine, gm/kg Diet (NRC Requirement is 5.0; half can be Cystine) | 4.7 | 5.8 |
| Cystine, gm/kg Diet (NRC Requirement is - see above) | 3.0 | 3.6 |
| Phenylalanine, gm/kg Diet (NRC Requirement is 7.6; half can be Tyrosine) | 7.9 | 9.7 |
| Tyrosine, gm/kg Diet (NRC Requirement is - see above) | 8.5 | 10.5 |
| Tryptophan, gm/kg Diet (NRC Requirement is 1.0) | 2.0 | 2.4 |
| Sodium (mg/kg diet) | 979 | 1203 |
| Sodium (mg/3982.5 kcal) | 1033 | 1033 |
